# Supplementary material for: Breast cancer cells obtain an osteomimetic feature via epithelial-mesenchymal transition that have undergone BMP2/RUNX2 signaling pathway induction
Source: Oncotarget. 2016 Oct 27;7(48):79688–705. doi: 10.18632/oncotarget.12939 (PMC5346745; doi:10.18632/oncotarget.12939)
Supplement: Supplementary file 1 [file oncotarget-07-79688-s001.pdf]

**Supplementary Figure S1: Breast cancers present an osteomimetic feature with the ectopic co-expression of a set of BRGs which are prone to bone metastasis.** **A.** Dendrograms for Figure 1B. The samples marked green are normal breast tissues (N) and the samples marked red are breast cancer tissues. **B.** The distribution of cases grouped by the expression of BRGs in (A) was analyzed using Chi-square test and Fisher's exact test. **C.** The difference of the BRGs expression levels between normal tissues and cancer tissues based on our gene expression profiling dataset was shown as Box-and-whisker plot and analyzed using Wilcoxon rank sum test. **D.** Dendrograms of Figure 1C. The samples marked green are non-bone metastatic breast cancer tissues and the samples marked red are bone metastatic breast cancer tissues. **E.** The distribution of cases grouped by the expression of BRGs in (D) was analyzed using Chi-square test and Fisher's exact test. **F.** The difference of BRGs expression levels between non-bone metastatic breast cancer tissues and bone metastatic breast cancer tissues of Zhang's gene expression profiling dataset was shown as Box-and-whisker plot and analyzed using Wilcoxon rank sum test.

**A**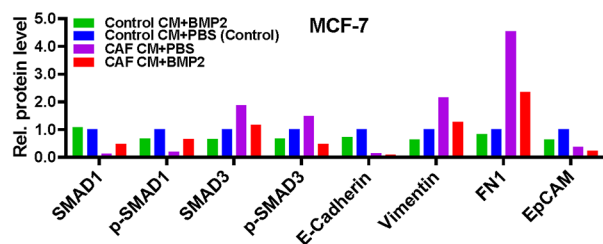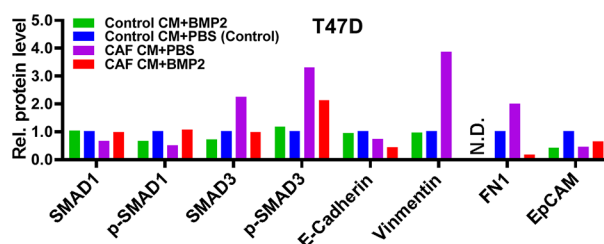**B**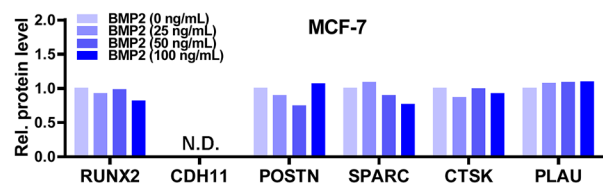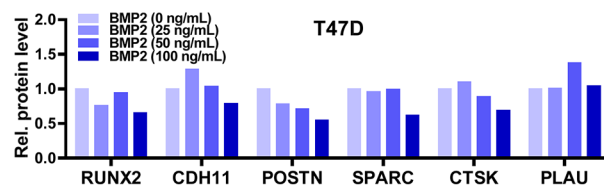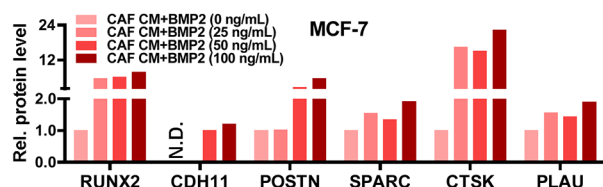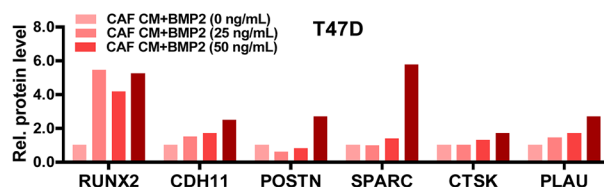**C**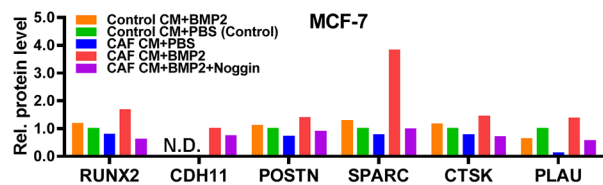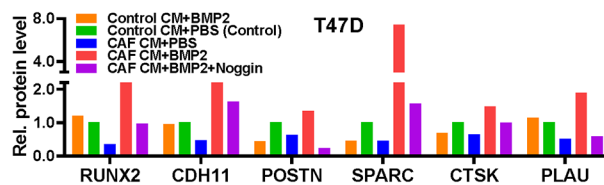

**Supplementary Figure S2: The co-expression of BRGs in breast cancer cells is derived from EMT that has undergone BMP2 induction.** A-C. The protein expression levels were semi-quantitatively analyzed by densitometric analysis of the immunoblot bands in Figures 2A, 2B and 2C. Data are presented as densitometric values normalized to the corresponding  $\beta$ -actin internal control. The relative protein expression levels are presented as the ratio of protein expression in the indicated cells compared to that in their respective control cells. N.D., not detectable.

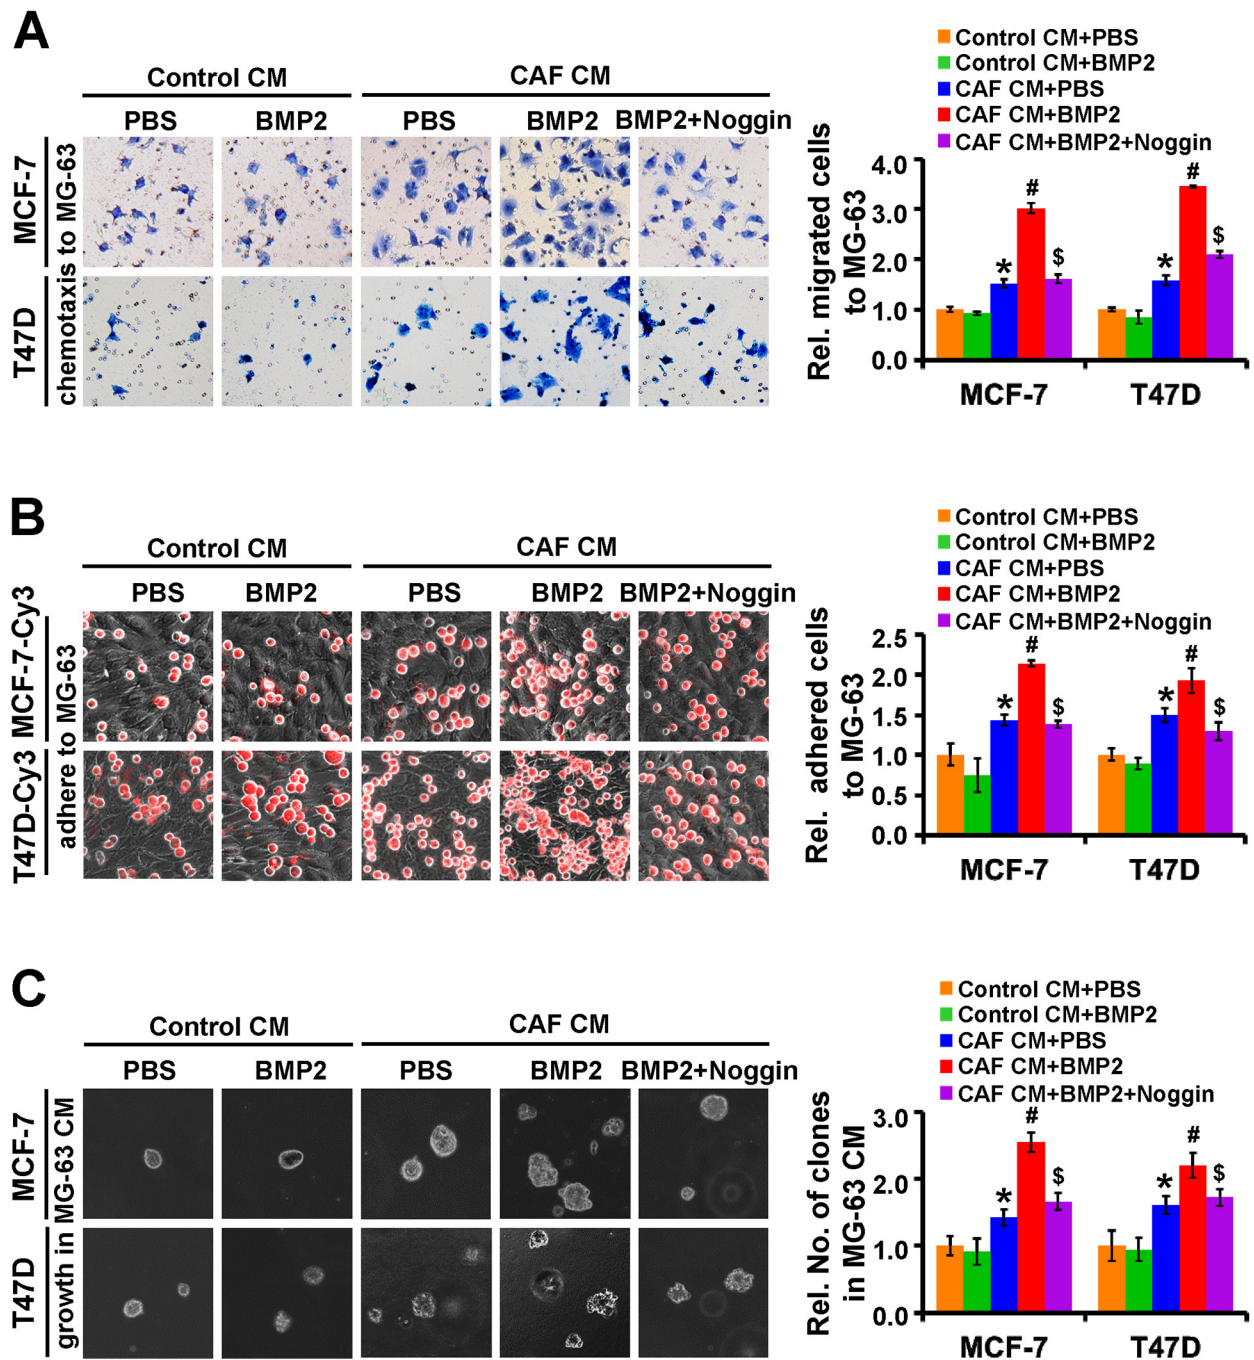

**Supplementary Figure S3: The epithelial cancer cells with co-expression of BRGs induced by CAF CM/BMP2 gain the advantages of homing to, residing in and growing in the MG-63 cell-mimic bone microenvironment.** MCF-7 and T47D cells were treated as indicated. **A.** The chemotactic migration of cancer cells towards MG-63 cells was assessed by transwell assays. **B.** The adhesion of cancer cells (red, labeled with Cy3) to MG-63 cells was assessed by putting cancer cells on top of MG-63 cells at 100% confluence and incubating the co-culture for 30 minutes. **C.** The colony formation of cancer cells in soft agar containing MG-63 CM. Magnification: 200X. Data are presented as the mean  $\pm$  S.D. of three independent experiments performed in duplicate. \*,  $P < 0.05$  compared with cells treated with control CM plus PBS; #,  $P < 0.05$  compared with cells treated with CAF CM plus PBS; \$,  $P < 0.05$  compared with cells treated with CAF CM plus BMP2.

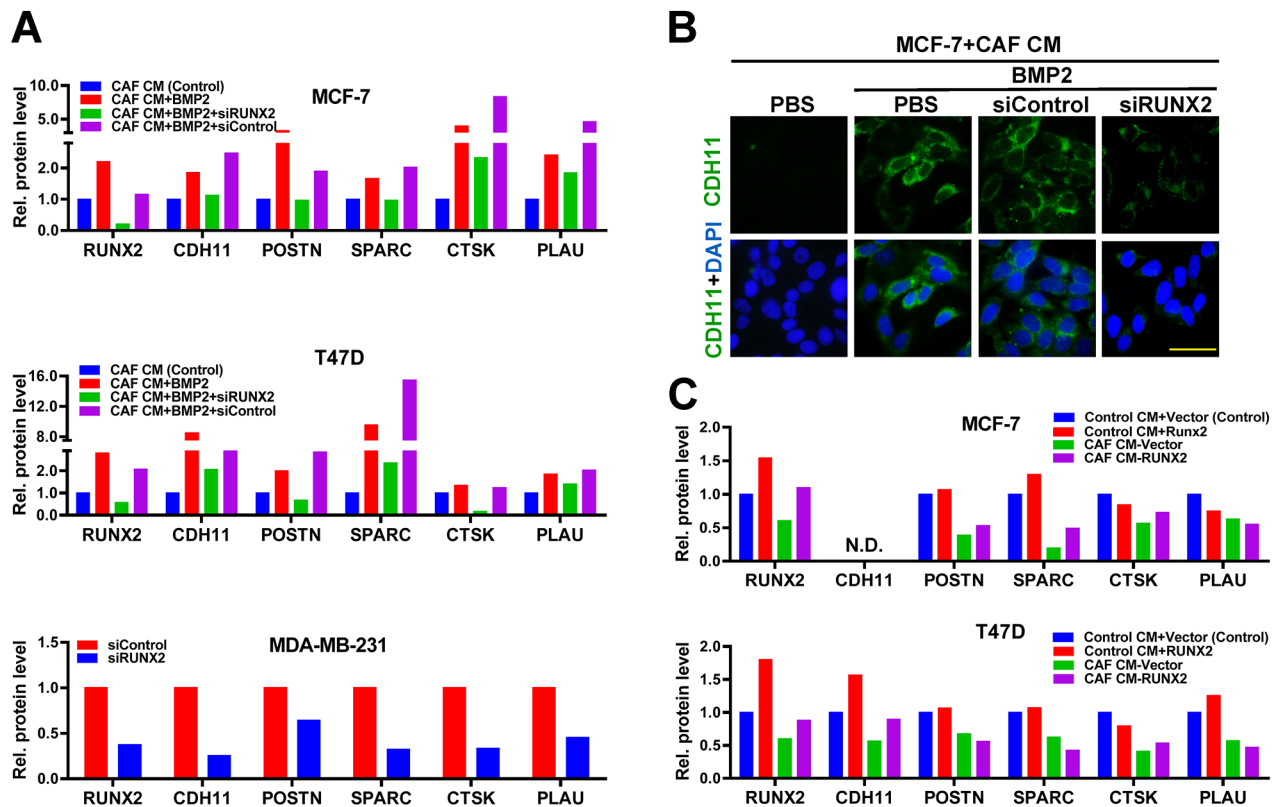

**Supplementary Figure S4: RUNX2 mediates the CAF/BMP2-induced co-expression of BRGs in breast cancer cells. A.** The protein expression levels were semi-quantitatively analyzed by densitometric analysis of the immunoblot bands in Figure 4A. **B.** The expression and localization of CDH11 (green) in MCF-7 cells treated as indicated were detected by immunofluorescence. DAPI staining (blue) indicates the nucleus. Scale bar, 40  $\mu$ m. **C.** The protein expression levels were semi-quantitatively analyzed by densitometric analysis of the immunoblot bands in Figure 4B. Data are presented as densitometric values normalized to the corresponding  $\beta$ -actin internal control. The relative protein expression levels are presented as the ratio of the expression level in the indicated cells to that in their respective control cells. N.D., not detectable.

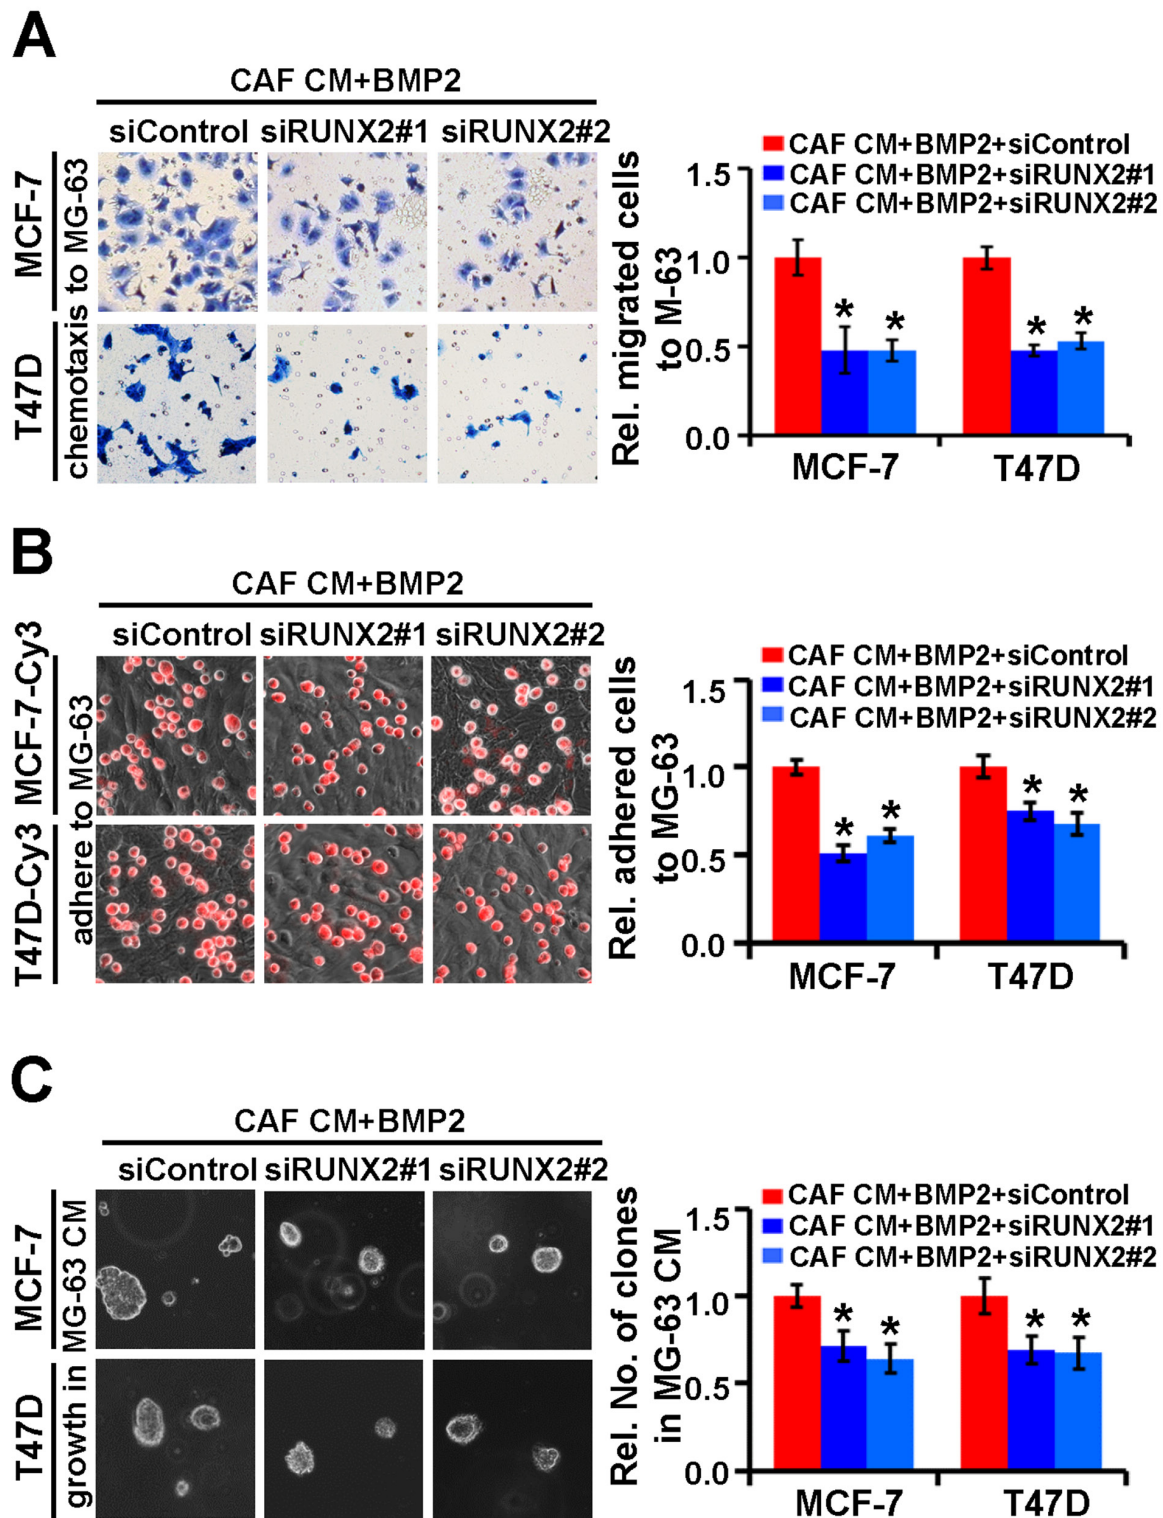

**Supplementary Figure S5: RUNX2 is critical for the CAF CM/BMP2-induced ability of breast cancer cells to home to, reside in and grow in the bone microenvironment.** MCF-7, T47D and MDA-MB-231 cells were treated as indicated. **A.** The chemotactic migration of cancer cells towards MG-63 cells was assessed by transwell assay. **B.** The adhesion of cancer cells (red, labeled with Cy3) to MG-63 cells was assessed by putting cancer cells on top of MG-63 cells at 100% confluence and incubating the co-culture for 30 min. **C.** The colony formation of cancer cells in soft agar with MG-63 CM. Magnification: 200X. Data are presented as the mean  $\pm$  SD of two independent experiments performed in duplicate. \*,  $P < 0.05$  compared with the corresponding siControl.

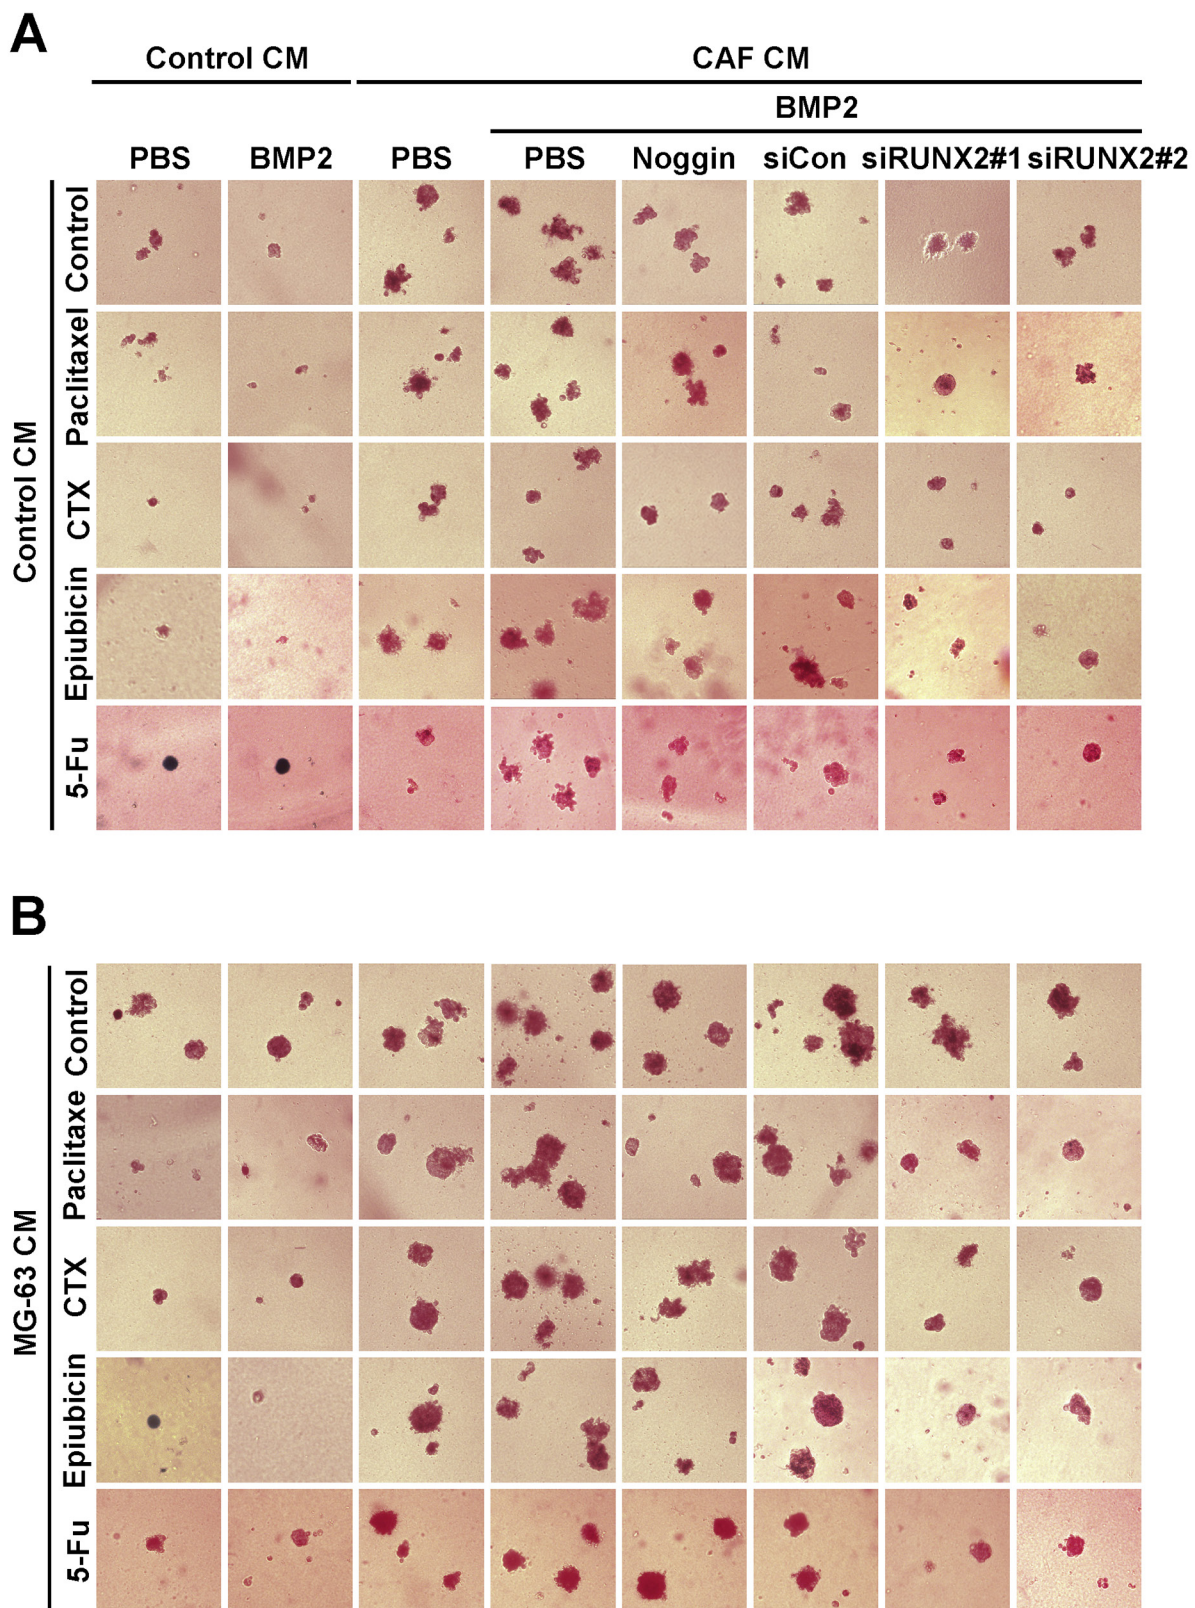

**Supplementary Figure S6: CAF/BMP2/RUNX2-induced co-expression of BRGs in breast cancer cells enhances multidrug resistance.** The images of live colonies of MCF-7 cells treated as indicated in soft agar with control CM **A**) or MG-63 CM **B**) after drug treatment. Live colonies were stained with MTT. Magnification: 200X.

Supplementary Table S1: Primers and TaqMan probes for RT-QPCR

| Genes         | Forward primers        | Reverse primers         | Probes (5'-FAM to 3'-TAMRA) |
|---------------|------------------------|-------------------------|-----------------------------|
| <i>RUNX2</i>  | CTCTGCACCAAGTCCTTTAATC | AGGAGGGGTAAGACTGGTCATAG | TGCCTGGGGTCTGTAATCTGAC      |
| <i>ITGBL1</i> | TCGCATTGACCTTCCTCTTC   | TCCCGTTGTTTTGATATTC     | CAGAGGAGCTGCTCCAGTTGATGT    |
| <i>SPARC</i>  | GGACAACAACCTTCTGACTGAG | CTGCCAGTGTACAGGGAAGAT   | CTGCGGGTGAAGAAGATCCATGAGA   |
| <i>POSTN</i>  | AATGGAAGGAATGAAAGGCTG  | CCTCGATCTCCTCCCTCAGT    | AGCAGTTTGGCCATTGACCATGTT    |

Supplementary Table S2: Antibodies used in immunoblot and/or immunofluorescence

| Name                      | Source | Clone No. | Company                   |
|---------------------------|--------|-----------|---------------------------|
| <b>Primary antibody</b>   |        |           |                           |
| $\beta$ -actin            | Mouse  | AC-15     | Sigma                     |
| Vimentin                  | Mouse  | V9        | Zymed                     |
| Fibronectin 1             | Mouse  | P5F3      | Santa Cruz                |
| E-cadherin                | Mouse  | 4A2C7     | ZS-GB-BIO                 |
| EpCAM                     | Mouse  | VU1D9     | Cell signaling technology |
| Smad1                     | Rabbit | D59D7     | Cell signaling technology |
| Phospho-Smad1             | Rabbit | D40B7     | Cell signaling technology |
| Smad3                     | Rabbit | C67H9     | Cell signaling technology |
| Phospho-Smad3             | Rabbit | C25A9     | Cell signaling technology |
| RUNX2                     | Rabbit | M-70      | Santa Cruz                |
| CDH11                     | Rabbit | P707      | Cell signaling technology |
| POSTN                     | Rabbit |           | Abcam                     |
| SPARC                     | Goat   |           | R&D systems               |
| CTSK                      | Mouse  | E7        | Santa Cruz                |
| PLAU/uPA                  | Rabbit | H-140     | Santa Cruz                |
| <b>Secondary antibody</b> |        |           |                           |
| Anti-Mouse                | Horse  |           | Cell signaling technology |
| Anti-Rabbit               | Goat   |           | Cell signaling technology |
| Anti-Goat                 | Donkey |           | R&D systems               |

Supplementary Table S3: Primers for ChIP and dual-luciferase reporter assays

| Genes                                    | Region on promoters | Forward primers        | Reverse primers        |
|------------------------------------------|---------------------|------------------------|------------------------|
| <b>Primers for ChIP assay</b>            |                     |                        |                        |
| <i>PCOLCE</i>                            | –608/–359           | AATTCCTTCTCCTTGGCCTA   | CTTAGCCTCCCGAGTAGCTG   |
| <i>POSTN</i>                             | –1004/–825          | GATGGTGTGCAGCTTGTTTA   | AGCCTTTCAATGTTACACTA   |
|                                          | –1344/–1137         | TTCTTTTGAATTGCCCTT     | GGAAGTGGACTGAACTAGAG   |
| <i>CTSK</i>                              | –506/–298           | GCTGTCATAAATAACCAGGA   | AGCCTTTTATGTTTCATTACCG |
|                                          | –742/–599           | GGGTTCTGATCACATTGCAC   | CTAGGAGACTATGTTGGTTC   |
| <i>ADAMTS2</i>                           | –1898/–1681         | CGCTGTGTAAAGAAATACCCA  | CATGAGTTGAATTGTGAAGGC  |
| <b>Primers for dual-luciferase assay</b> |                     |                        |                        |
| <i>PCOLCE</i>                            | –226/+361           | AAAATGAGCTGGCAGGGGTG   | GCATAACCCCAAAGGAATCGG  |
|                                          | –859/+361           | CCTGCCCACTAGACTTGTTCC  | GCATAACCCCAAAGGAATCGG  |
| <i>POSTN</i>                             | –397/+222           | TAATCAACAGCCTTTACCC    | CTGATACGACTATGAGCCA    |
|                                          | –1235/+408          | ATAAACTAAGCAGCAAGTTGT  | AAAGTGCATAGATAAATCACAG |
| <i>CTSK</i>                              | –297/+216           | AGCCTTTTATGTTTCATTACCG | ATCTGTTGTCTGGCTTCGTT   |
|                                          | –502/+216           | GCTGTCATAAATAACCAGGA   | ATCTGTTGTCTGGCTTCGTT   |
|                                          | –1244/+216          | CTAGGAGACTATGTTGGTTC   | ATCTGTTGTCTGGCTTCGTT   |
| <i>ADAMTS2</i>                           | –484/+354           | CCCCTCCCCTTTCATTCCC    | CGCGGAGTTTGCCCAAGTCA   |
|                                          | –1799/+354          | GAAGAGGATGGAAGCGCTGA   | CGCGGAGTTTGCCCAAGTCA   |
